# Supplementary material for: 5-Aza-2′-deoxycytidine causes replication lesions that require Fanconi anemia-dependent homologous recombination for repair
Source: PubMed Central journal article supplement — Nucleic Acids Res. 2013 Apr 22;41(11):5827–36. doi: 10.1093/nar/gkt270 (PMC3675485; doi:10.1093/nar/gkt270), 2013-04-22
Supplement: supp_gkt270_nar-00059-v-2013-File009.pdf [file supp_gkt270_nar-00059-v-2013-File009.pdf]

## **SUPPLEMENTAL MATERIAL & METHODS**

### **Cell lines**

The VC8 cell line, derived from the V79 Chinese hamster lung fibroblast cell line, has a mutation in the *BRCA2* gene resulting in impaired HR (43). The restored cell line VC8-B2 is complemented with human *BRCA2*.

The Fanconi Anemia cell line PD20 (*FANCD2*<sup>-/-</sup>) are fibroblasts derived from a Fanconi Anemia patient. The PD20 3.15 cell line is a PD20-derived cell line expressing a wt *FANCD2*. These cell lines have been a gift from Jordi Surralles (Genome Instability and DNA Repair Group, Department of Genetics and Microbiology, Universitat Autònoma de Barcelona, Barcelona, Spain) and have been already described (44).

### **Colony formation**

Cell survival following 5-azadC treatment was measured by clonogenic assay. VC8, VC8-B2, PD20 and PD20 3.15 were plated at low density onto 10 cm Petri dishes. After 4 hours cultures were incubated for 24 hours (VC8 and VC8-B2) or 48 hours (PD20 and PD20 3.15) in the presence of different concentrations of 5-azadC. Then 5-azadC was discarded and the cultures were allowed to grow from 7-10 days. Colonies were stained with methylene blue prepared in methanol (4 g/L). Surviving colonies made up of more than 50 cells per colony were counted. The data have been corrected according to cloning efficiencies of control cells. Results are the average from 2-3 independent experiments.

#### **SUPPLEMENTAL REFERENCES:**

43. Kraakman-van der Zwet,M., Overkamp,W.J., van Lange,R.E., Essers,J., van Duijn-Goedhart,A., Wiggers,I., Swaminathan,S., van Buul,P.P., Errami,A., Tan,R.T. et al. (2002) Brca2 (XRCC11) deficiency results in radioresistant DNA synthesis and a higher frequency of spontaneous deletions. *Mol. Cell. Biol.*, **22**, 669–679.
  
44. Castillo,P., Bogliolo,M., Surralles,J. (2011). Coordinated action of the Fanconi anemia and ataxia telangiectasia pathways in response to oxidative damage. *DNA Repair.*, **10**, 518-525.
