# Supplementary material for: 5-Aza-2′-deoxycytidine causes replication lesions that require Fanconi anemia-dependent homologous recombination for repair
Source: PubMed Central journal article supplement — Nucleic Acids Res. 2013 Apr 22;41(11):5827–36. doi: 10.1093/nar/gkt270 (PMC3675485; doi:10.1093/nar/gkt270), 2013-04-22
Supplement: supp_gkt270_nar-00059-v-2013-File010.pdf [file supp_gkt270_nar-00059-v-2013-File010.pdf]

## SUPPLEMENTARY 1

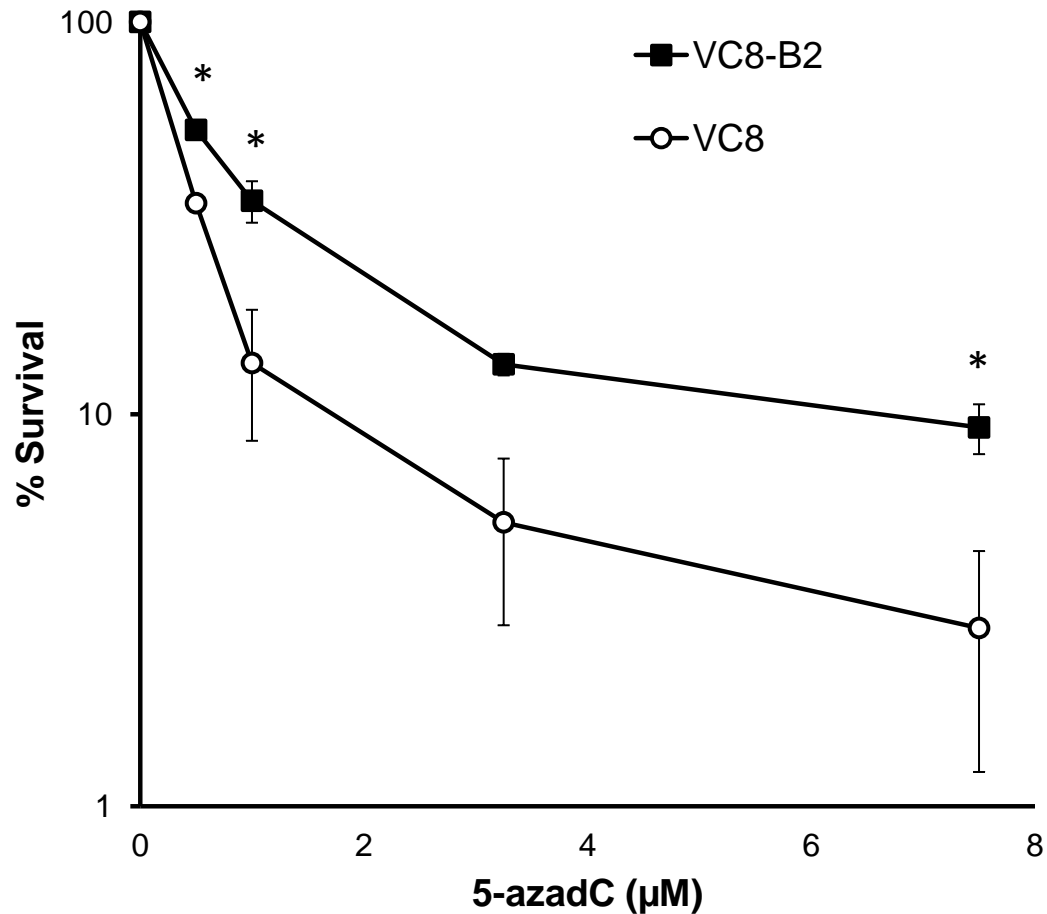

**Supplementary figure 1. BRCA2 is needed for survival after a 5-azadC treatment.** Cell survival after a 24 hours treatment with increasing concentrations of 5-azadC. VC8 and VC8-B2 cells were seeded on Petri dishes and allowed to attach for 4 hours, subsequently they were treated with increasing concentrations of 5-azadC ranging from 0.5 to 7.5 µM. Then media was changed and cells were allowed to form colonies. Results represent the mean and the standard deviation from two independent experiments. Differences were statistically significant (\*P < 0.05, according Student's *t*-test).

## SUPPLEMENTARY 2

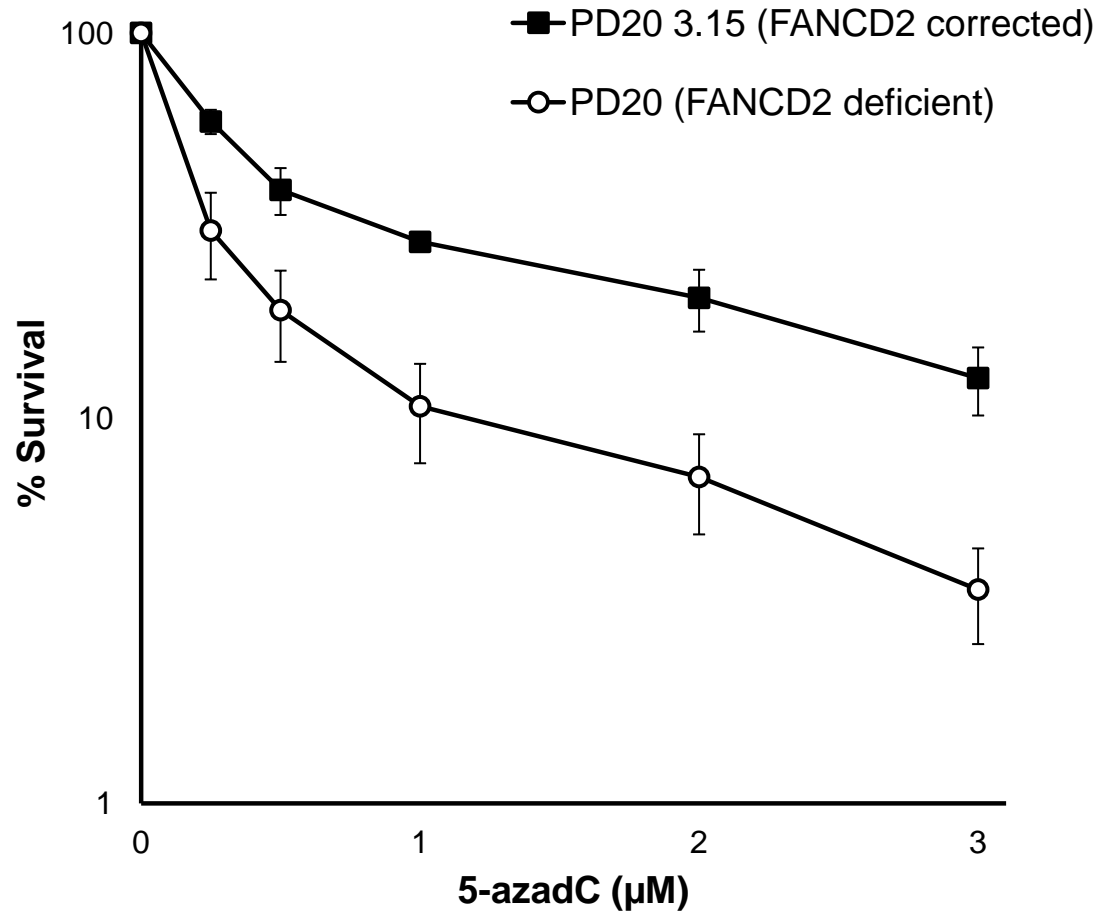

**Supplementary figure 2. FANCD2 promotes survival after a 5-azadC treatment.** Cell survival after a 48 hours treatment with increasing concentrations of 5-azadC. PD20 and PD20 3.15 cells were seeded on Petri dishes and allowed to attach for 4 hours, subsequently they were treated with increasing concentrations of 5-azadC. Then media was changed and cells were allowed to form colonies. Results represent the mean and the standard deviation from three independent experiments. Differences were statistically significant for all tested dosis.

## SUPPLEMENTARY 3

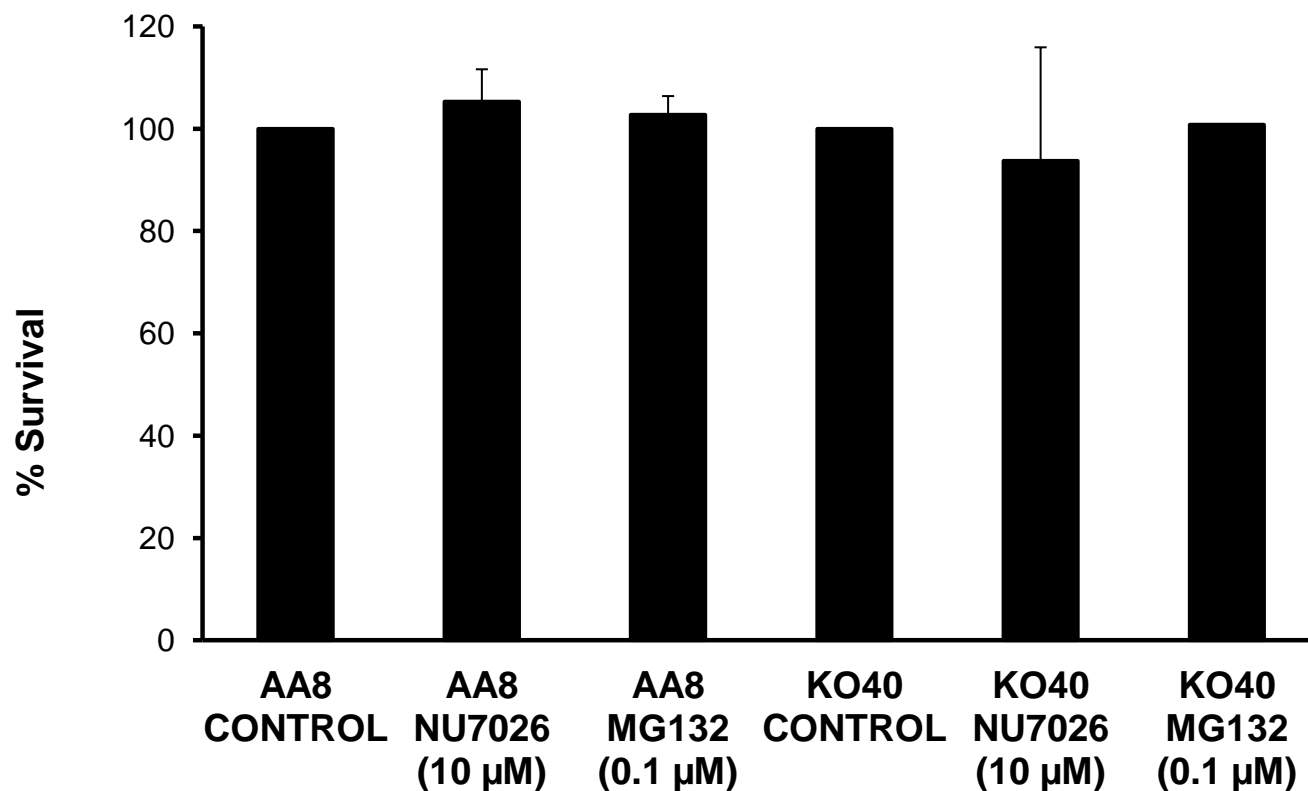

**Supplementary figure 3. Survival of AA8 and KO40 cells after treatments with NU7026 and MG132.** Cultures of AA8 and KO40 cells in exponential growth were plated at low density onto 10 cm Petri dishes. After 4 hours AA8 and KO40 cells were exposed to NU7026 or MG132 for 48 hours (following the protocol described in Material & Methods). Untreated controls did not receive any treatment. Drugs were then discarded and cultures were allowed to grow in fresh media for 7-10 days and analyzed for colony-forming efficiency. Results represent the mean and the standard deviation from two independent experiments. Results did not show any statistical difference between controls and treated cells.
